38. Birukov KG, Jacobson JR, Flores AA, Ye SQ, Birukova AA, Verin AD, Garcia JG: Magnitude-dependent regulation of pulmonary endothelial cell barrier function by cyclic stretch. *Am J Physiol Lung Cell Mol Physiol* 2003; 285: L785-97
39. Shikata Y, Rios A, Kawkitinarong K, DePaola N, Garcia JG, Birukov KG: Differential effects of shear stress and cyclic stretch on focal adhesion remodeling, site-specific FAK phosphorylation, and small GTPases in human lung endothelial cells. *Exp Cell Res* 2005; 304:40-9
40. Peng X, Abdunnour RE, Sammani S, Ma SF, Han EJ, Hasan EJ, Tudor R, Garcia JG, Hassoun PM: Inducible nitric oxide synthase contributes to ventilator-induced lung injury. *Am J Respir Crit Care Med* 2005; 172:470-9
41. Abdunnour RE, Peng X, Finigan JH, Han EJ, Hasan EJ, Birukov KG, Reddy SP, Watkins JE III, Kayyali US, Garcia JG, Tudor RM, Hassoun PM: Mechanical stress activates xanthine oxidoreductase through MAP kinase-dependent pathways. *Am J Physiol Lung Cell Mol Physiol* 2006; 291: L345-53

## ANESTHESIOLOGY REFLECTIONS

### *The Morton House II* by Vandam

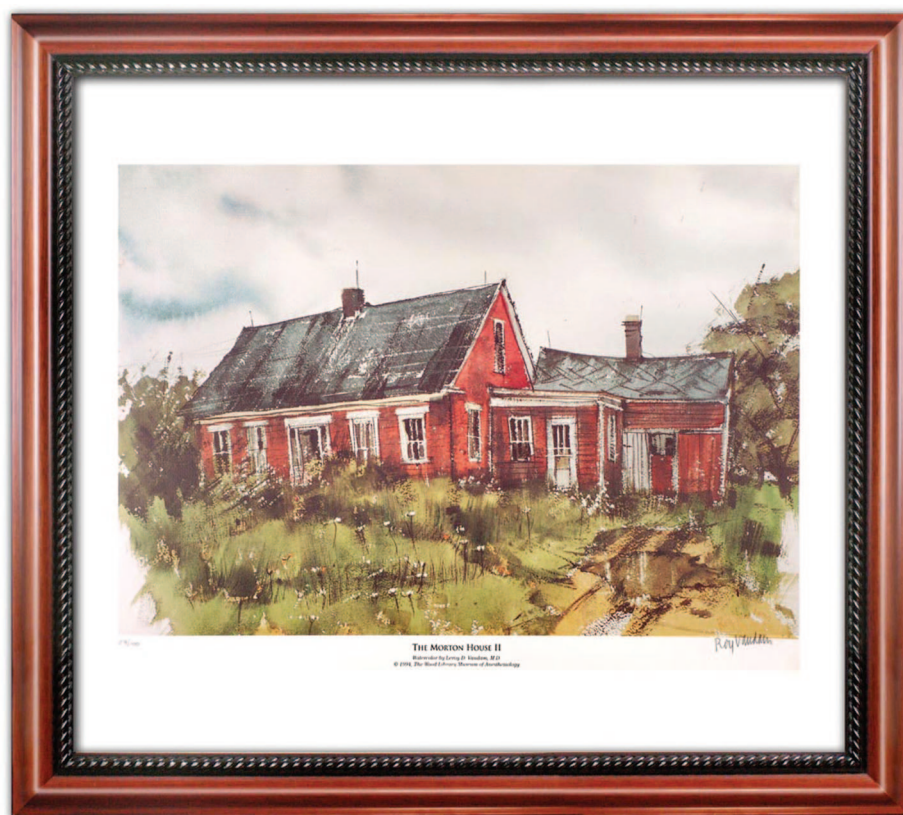

History tells us that the etherizer who first *publicly* demonstrated surgical anesthesia was William Thomas Green Morton (1819–1868). However, the muse Clio seems confused as to whether Morton was born at the site above on August 9 or 19. A retired Editor of *ANESTHESIOLOGY*, watercolorist and anesthesiologist Leroy D. Vandam (1914–2004), after visiting Morton's birthplace, had observed that the "original Morton house was a large, square old-fashioned wooden house on a farm that was deeded to William Thomas Green Morton's mother, Rebecca, by her father, John Stevens." Because the original Morton house had burned, its successor was the edifice (above) that Professor Vandam captured with watercolors. As a benefit for the Wood Library-Museum, just a few of the 100 prints signed by the late Dr. Vandam remain available for sale. (Copyright © the American Society of Anesthesiologists, Inc. This image appears in color in the *Anesthesiology Reflections* online collection available at [www.anesthesiology.org](http://www.anesthesiology.org).)

George S. Bause, M.D., M.P.H., Honorary Curator, ASA's Wood Library-Museum of Anesthesiology, Park Ridge, Illinois, and Clinical Associate Professor, Case Western Reserve University, Cleveland, Ohio. [UJYC@aol.com](mailto:UJYC@aol.com).
